# Supplementary material for: Reactive Oxygen Species and Gibberellin Acid Mutual Induction to Regulate Tobacco Seed Germination
Source: PubMed Central journal article supplement (PMC6190896; doi:10.3389/fpls.2018.01279), 2018-10-02
Supplement: Presentation_1.pdf [file Presentation_1.pdf]

Supplementary data

## Reactive oxygen species and gibberellin acid mutual induction to regulate tobacco seed germination

Zhan Li<sup>1\*\*</sup>, Yue Gao<sup>1\*\*</sup>, Yuchan Zhang<sup>1</sup>, Cheng Lin<sup>1</sup>, Dongting Gong<sup>1</sup>, Yajing Guan<sup>1\*</sup>, Jin Hu<sup>1</sup>

<sup>1</sup> Seed Science Center, College of Agriculture and Biotechnology, Zhejiang University, Hangzhou 310058, China

**Table S1.** Real-time PCR primers used for genes expression analysis

| Gene Name         | Forward                  | Reverse                    |
|-------------------|--------------------------|----------------------------|
| <i>NtABI3</i>     | GAGTATCAGACCATGGAATCTGC  | TTCCATCGCGGAGAATTG         |
| <i>NtABI5</i>     | CGCAAAAGGCGACTAACAA      | ACACATCAAGGGCAACTCAA       |
| <i>NtGA20ox1</i>  | TTGCCACTTTCTGAAAAGCA     | CTGGCATAACCACAATGCTC       |
| <i>NtGA20ox2</i>  | AATTCATATGGCCGGAAGG      | GGAGGGACATGTAATGGAGGT      |
| <i>NtGA3ox2</i>   | TGGAAAACTAGCCGGAAGA      | GCCCATTTTCATATCGTCCTTAC    |
| <i>NtGA2ox1</i>   | TCATTGTAACTTCACCAAGCAA   | AAATGGTCAATGCCAGGTTT       |
| <i>NtGA2ox2</i>   | TTGGAGGACCACCATTGAGT     | CAAGCTGTCTTGATCCCCTTT      |
| <i>NtGID1</i>     | TTGCCTTCCTAGTTGCTGTG     | CAGAACAGACACTTCTGAAATAGCA  |
| <i>NtGID2</i>     | ACCTCTGGCCACTCTCAAAG     | CGGAAGTTGGAGTCGAAGAA       |
| <i>NtRGL2</i>     | GCAGTGACGCAGTCCAAA       | TGTCAATTTATAACCATCACACGA   |
| <i>NtNCED1</i>    | TGGCATCTACAACCTCTGCTT    | AGTCTCTTGAAGATGGCATTGAT    |
| <i>NtNCED3</i>    | TGGCATCTACAACCTCTGCTT    | AGTCTCTTGAAGATGGCATTGAT    |
| <i>NtCYP707A1</i> | GGAATTCAGTATGGGCCATTT    | GGGATATAGCTTAATGGGCAGA     |
| <i>NtCYP707A2</i> | TGTATGCCATATGCATCTAAGGTT | CTTGAAACCAAGGCACAA         |
| <i>NtRBOH</i>     | CTGTTTTCTCCGAGGTTTGC     | CAGCTCTGAGGAGTCCACTTTT     |
| <i>NtICL</i>      | AGCCCATGGAGTTGACACAT     | TCTATCATAGTAATTAGCACCAGACC |
| <i>Actin</i>      | CTATTCTCCGCTTTGGACTTGGCA | ACCTGCTGGAAGGTGCTGAGGGAA   |

\*\*These authors contributed equally to this work.

\*Corresponding author. Tel.: +86 57188982318; fax: +86 57188982318; E-mail address: vcguan@zju.edu.cn

**Table S2.** Seed vigor and viability of Yunyan 97 during seed germination

| Treatments                         | GP         |             |             | GI        |            |            | MGT     |            |            |
|------------------------------------|------------|-------------|-------------|-----------|------------|------------|---------|------------|------------|
|                                    | 2          | 5           | 7           | 2         | 5          | 7          | 2       | 5          | 7          |
| H <sub>2</sub> O                   | 0.0±0.0* b | 86.0±3.0 c  | 91.0±1.0 c  | 0.0±0.0 b | 20.4±0.7 d | 21.1±0.3 d | —       | 4.3±0.0 b  | 4.3±0.0 a  |
| H <sub>2</sub> O <sub>2</sub>      | 5.0±1.0 a  | 92.0±2.0 a  | 95.0±1.0 a  | 2.5±0.5 a | 24.3±0.9 b | 24.8±0.8 b | 2.0±0.0 | 3.9±0.0 d  | 3.9±0.1 c  |
| Uni                                | 0.0±0.0 b  | 0.0±0.0 d   | 31.7±2.1 e  | 0.0±0.0 b | 0.0±0.0 e  | 5.3±0.4 f  | —       | —          | 0.4±0.2 g  |
| H <sub>2</sub> O <sub>2</sub> +Uni | 0.0±0.0 b  | 92.0±1.7 a  | 92.3±1.2 bc | 0.0±0.0 b | 22.3±0.4 c | 22.4±0.3 c | —       | 4.2±0.0 c  | 4.2±0.0 ab |
| GA                                 | 5.7±1.2 a  | 91.0±1.0 ab | 94.3±1.2 a  | 2.8±0.6 a | 25.4±0.5 a | 26.0±0.5 a | 2.0±0.0 | 3.7±0.0 f  | 3.6±0.1 de |
| DPI                                | 0.0±0.0 b  | 2.3±1.2 d   | 42.0±1.0 d  | 0.0±0.0 b | 0.5±0.2 e  | 7.0±0.2 e  | —       | 5.0±0.0 a  | 0.7±0.0 f  |
| GA+DPI                             | 0.0±0.0 b  | 91.7±1.5 a  | 94.7±1.5 a  | 0.0±0.0 b | 22.0±0.4 c | 22.5±0.4 c | —       | 4.2±0.0 bc | 4.1±0.0 b  |
| Uni+DPI                            | 0.0±0.0 b  | 0.0±0.0 d   | 0.0±0.0 f   | 0.0±0.0 b | 0.0±0.0 e  | 0.0±0.0 g  | —       | —          | —          |
| H <sub>2</sub> O <sub>2</sub> +DPI | 0.0±0.0 b  | 89.0±1.0 b  | 94.0±1.0 ab | 0.0±0.0 b | 24.0±0.4 b | 24.8±0.3 b | —       | 3.8±0.0 e  | 3.7±0.1 d  |
| GA+Uni                             | 5.7±1.2 a  | 90.7±1.2 ab | 94.7±0.6 a  | 2.8±0.6 a | 25.6±0.5 a | 26.2±0.4 a | 2.0±0.0 | 3.7±0.0 f  | 3.6±0.0 e  |

\*Values were mean ± SE (n = 4). Different small letter (s) following the values indicated significant difference (LSD,  $\alpha=0.05$ ) during seed development. GP: germination percentage, GI: germination index, MGT: mean germination time ( $GP=100\% \times G_T/100$ , where  $G_T$  is the total germination seeds on the 2<sup>nd</sup>, 5<sup>th</sup> and 7<sup>th</sup> day, respectively;  $GI = \sum (Gt/Tt)$ ,  $MGT = \sum (Gt \times Tt) / \sum Gt$ , where  $Gt$  is the number of new germinated seeds in time  $Tt$ , 2<sup>nd</sup>, 5<sup>th</sup> and 7<sup>th</sup> day.

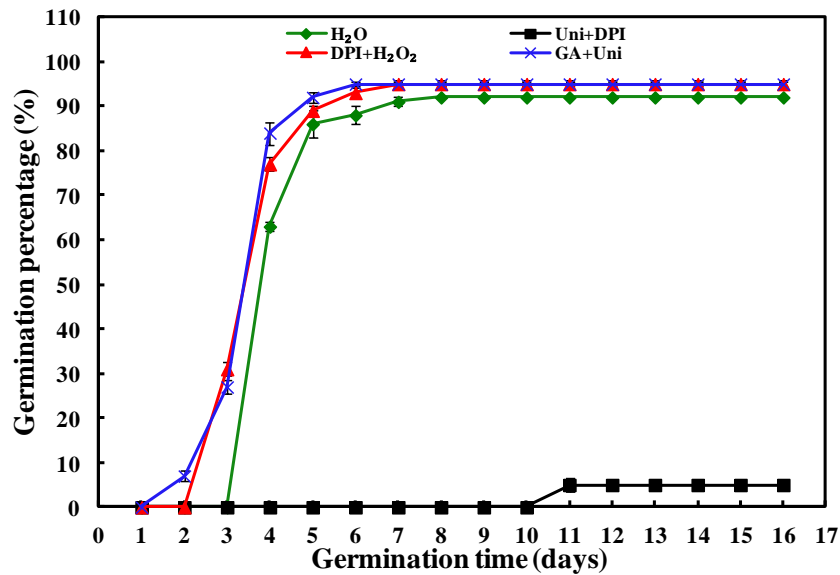

**Fig. S1.** GA or H<sub>2</sub>O<sub>2</sub> was essential for seed germination. GA: gibberellin acid; H<sub>2</sub>O<sub>2</sub>: hydrogen peroxide ; Uni: uniconazole, GA synthesis inhibitor; DPI: diphenyliodonium, H<sub>2</sub>O<sub>2</sub> scavenger. H<sub>2</sub>O: hydropriming (water priming); Uni+ DPI: 30  $\mu$ M Uni and 100  $\mu$ M DPI combination priming. DPI+ H<sub>2</sub>O<sub>2</sub>: 50 mM H<sub>2</sub>O<sub>2</sub> and 100 $\mu$ M DPI combination priming; GA+ Uni: 10 mM GA and 30  $\mu$ M Uni combination priming. Vertical bars above mean indicated standard error of six replicates of 50 seeds each for each treatment. Values were mean  $\pm$  SE (n = 6).

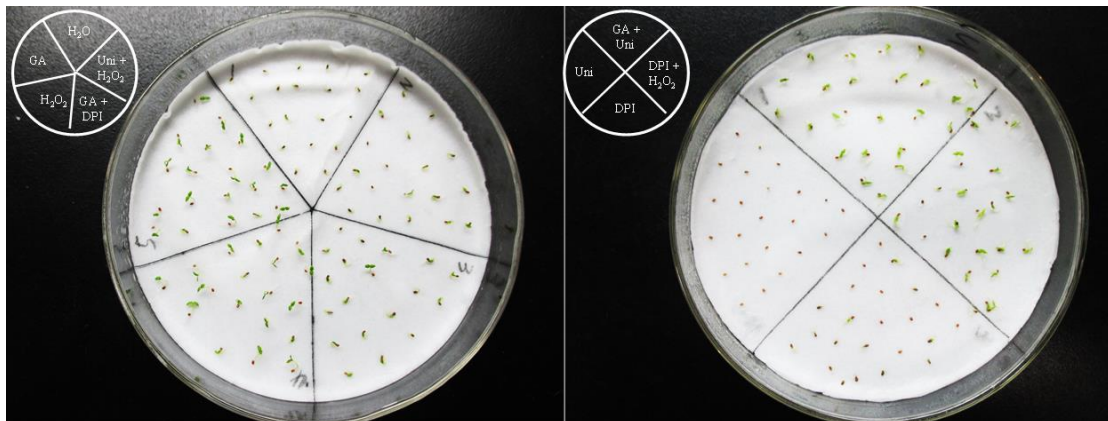

**Fig. S2.** Seed germination of different treatments on the fifth day after sowing. GA: gibberellin acid; H<sub>2</sub>O<sub>2</sub>: hydrogen peroxide ; Uni: uniconazole, GA synthesis inhibitor; DPI: diphenyliodonium, H<sub>2</sub>O<sub>2</sub> scavenger. H<sub>2</sub>O: hydropriming (water priming); Uni+ DPI: 30  $\mu$ M Uni and 100  $\mu$ M DPI combination priming. DPI+ H<sub>2</sub>O<sub>2</sub>: 50 mM H<sub>2</sub>O<sub>2</sub> and 100 $\mu$ M DPI combination priming; GA+ Uni: 10 mM GA and 1 mM Uni combination priming.

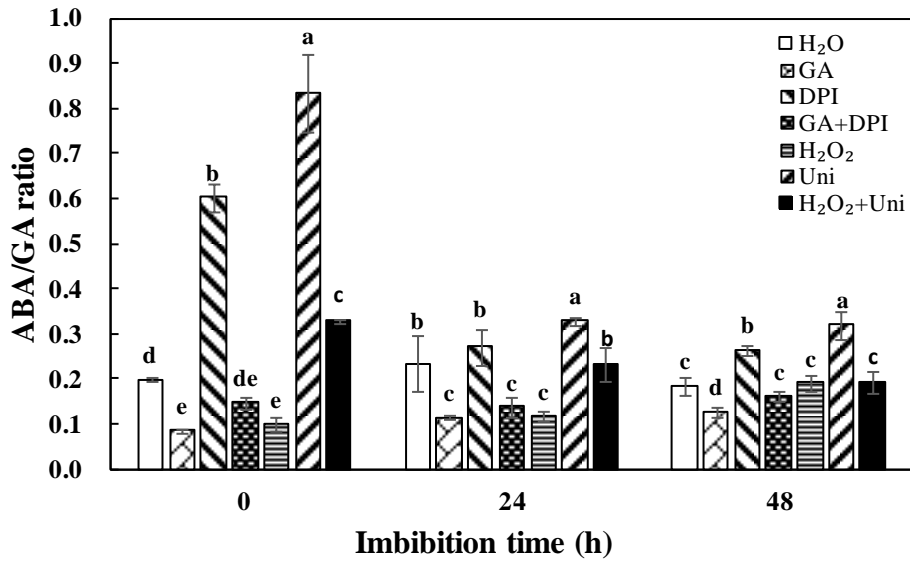

**Fig. S3.** Changes of ABA/GA<sub>3</sub> ratio during seed imbibition in response to different treatments. Seed were collected respectively at 0, 24 and 48 h during imbibition, and four replications for each treatment at each sampling time were used. Different small letter (s) on the top of the bars indicated significant differences (LSD,  $\alpha=0.05$ ) among treatments at same imbibition time. Error bars indicated  $\pm$  SE of mean ( $n = 4$ ). For additional explanations, please see Fig.1.

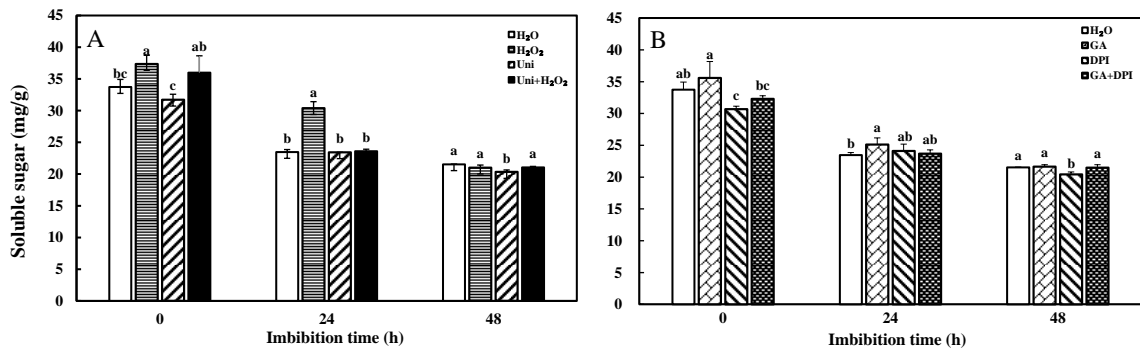

**Fig. S4.** Changes of soluble sugar during seed imbibition in response to different treatments. Seed were collected respectively at 0, 24 and 48 h during imbibition, and four replications for each treatment at each sampling time were used. Different small letter (s) on the top of the bars indicated significant differences (LSD,  $\alpha=0.05$ ) among treatments at same imbibition time. Error bars indicated  $\pm$  SE of mean ( $n = 4$ ). For additional explanations, please see Fig.1.
